# 1 **Dynamamin A as a one-component division machinery for** 2 **synthetic cells**

3

4 Nicola De Franceschi<sup>1,2</sup>, Roman Barth<sup>1</sup>, Sabrina Meindlhumer<sup>1</sup>, Alessio Fragasso<sup>1</sup> and Cees Dekker<sup>1,\*</sup>

5

6 <sup>1</sup> *Department of Bionanoscience, Kavli Institute of Nanoscience Delft, Delft University of Technology, Delft,*  
7 *The Netherlands*

8 <sup>2</sup> *ReMedy International Research Agenda Unit, International Institute of Molecular Mechanisms and*  
9 *Machines (IMol), Polish Academy of Sciences, Warsaw, Poland.*

10 \* Corresponding author: [c.dekker@tudelft.nl](mailto:c.dekker@tudelft.nl)

11

12

## 13 **Abstract**

14 Membrane abscission, the final cut of the last connection between emerging daughter cells, is an  
15 indispensable event in the last stage of cell division, as well as in other cellular processes such as  
16 endocytosis, virus release, or bacterial sporulation. However, its mechanism remains poorly understood,  
17 which also impedes its application as a cell-division machinery for synthetic cells. Here, we use  
18 fluorescence microscopy and Fluorescence Recovery After Photobleaching (FRAP) to study the *in vitro*  
19 reconstitution of the bacterial protein Dynamamin A (DynA) inside liposomes. Upon external reshaping of the  
20 liposomes into dumbbells, DynA self-assembles at the membrane neck, resulting in membrane hemi-  
21 scission and even full scission. DynA proteins constitute a simple one-component division machinery that  
22 is capable of splitting dumbbell-shaped liposomes, marking an important step towards building a synthetic  
23 cell.

24

## 25 Introduction

26

27 The ability to divide is one of the most fundamental features of cellular life. Since all cells are surrounded  
28 by a lipid membrane, the division process in all organisms necessarily entails a significant membrane  
29 deformation. In a first step, the mid-cell region of the cell is constricted, resulting in the formation of a so-  
30 called dumbbell-like shape, where the two future daughter cells are still connected by a narrow neck. In  
31 eukaryotes, this process is driven by an actomyosin ring underneath the membrane<sup>1</sup>, whereas constriction  
32 in bacteria is coordinated intracellularly by the Z-ring<sup>2</sup> with peptidoglycan synthesis occurring at the outside  
33 of the membrane<sup>3</sup>. Following constriction into the dumbbell geometry, the final step of cell division consists  
34 of the membrane scission of the neck (also termed abscission). This is believed to be performed by yet other  
35 protein machineries such as the ESCRT-III complex in eukaryotes<sup>4</sup> and the evolutionary related Cdv  
36 complex in Archaea<sup>5</sup>, while it is not yet fully clear how abscission is accomplished in bacteria.

37

38 Membrane remodelling has been extensively studied in reconstituted systems<sup>6</sup>. Membrane abscission can  
39 be studied in various membrane geometries, i.e., where proteins act from the *outside* on a membrane neck,  
40 or in a geometry where a membrane-scission machinery acts from the *inside* of a membrane neck, the so-  
41 called “reverse topology” (Figure S1)<sup>7</sup>. A classic example of the former is endocytosis, where eukaryotic  
42 dynamin binds to the outside of a membrane neck and induces scission of endocytic pits<sup>8</sup>. Reverse-topology  
43 processes include scission events mediated by the ESCRT-III complex in eukaryotes<sup>9</sup>, and cell division and  
44 sporulation in bacteria<sup>10</sup>. Recent years witnessed a growing interest in building a self-sustaining and self-  
45 reproducing synthetic cell<sup>9</sup> – a liposome filled with proteins that exhibits features of natural cells. Cell  
46 division of such synthetic cells should occur in reverse topology as components of the division machinery  
47 need to be synthesized within the synthetic cell. However, such a division system has so far been missing  
48 <sup>11</sup>.

49

50 In the filamentous bacteria *Streptomyces*, two dynamin-like GTPases, DynA and DynB, localize near a  
51 septum where they induce the final stage of sporulation<sup>12</sup>. While the exact function of DynA/B in  
52 *Streptomyces* remains incompletely understood, bacterial dynamin-like proteins have been widely  
53 associated with membrane remodelling events<sup>13</sup>. For example, *B. subtilis* DynA, which is a fusion protein  
54 that combines the functionalities of both DynA and DynB within one protein<sup>14</sup>, has been shown to mediate  
55 Mg<sup>++</sup>-dependent membrane fusion *in vitro* by binding to the headgroups of negatively charged lipids, while  
56 GTP hydrolysis was found to be dispensable for this process<sup>15</sup>. Moreover, DynA was shown to counteract  
57 stress-induced pores<sup>16</sup> during phage infections<sup>17</sup>. Notably, membrane scission and fusion involve the same  
58 “topological reaction”, but run in opposite directions – from one to two vesicles, or vice versa (Figure 1a).

59 Inevitably, they both also entail the same intermediate: a hemi-scission/hemi-fusion state, where the split  
60 inner leaflet defines two distinct systems, while the outer leaflet still joins both vesicles ([Figure 1a](#)).

61  
62 Here, we address the question whether bacterial *B. subtilis* DynA protein is able to mediate membrane  
63 scission when reconstituted *inside* membrane necks. We reconstituted recombinant DynA inside liposomes  
64 that were deformed into a dumbbell shape using the recently developed Synthetic Membrane Shaper (SMS)  
65 approach<sup>18</sup>. Using fluorescence microscopy and Fluorescence Recovery After Photobleaching (FRAP), we  
66 monitored whether soluble dyes within the liposomes and fluorescently labelled lipids in the bilayer leaflets  
67 could diffuse across the membrane neck. The experiments revealed that DynA localizes at the dumbbell  
68 neck where it catalyses membrane hemi-scission, which subsequently progresses to full scission. Our data  
69 demonstrate a novel function for DynA and provide insights into the process of membrane scission in  
70 reverse topology, which is the biologically relevant geometry for cell division. Moreover, this dynamin-  
71 based single-protein system presents an elegant novel synthetic divisome that is of interest for establishing  
72 division in synthetic cells<sup>11</sup>.

73

## 74 **Results**

75

76 A high yield of dumbbell-shaped liposomes was obtained using the SMS technology that we recently  
77 introduced<sup>18</sup>. In this approach, droplets were generated by pipetting an “inner” aqueous solution into a lipid-  
78 in-oil suspension that was subsequently placed on top of a water reservoir, referred to as the “outer” buffer.  
79 Liposomes were then formed when the droplets crossed the oil-to-water interface (between oil and outer  
80 buffer) as they slowly sank due to gravity. The presence of small (96.5kDa) DNA structures called nanostars  
81 (which basically are Holliday Junctions armed with cholesterol moieties; hereafter collectively referred to  
82 as “CN”), in the outer solution caused their binding to the outer membrane during liposome formation,  
83 inducing membrane curvature, which led to a high yield of dumbbell-shaped liposomes.

84

85 When DynA was included in the inner solution, a strong preferential localization of DynA was observed at  
86 the membrane necks in the resulting dumbbell structures ([Figure 1b](#)), as evidenced by the presence of a  
87 bright fluorescent spot at the neck ([Movie 1](#)), whereas binding of DynA to the liposome membrane outside  
88 the neck region was minimal. The fact that DynA strongly localizes at the necks indicates that it prefers to  
89 bind to highly curved membranes. For the present work, we chose to focus on chains of dumbbells ([Figure](#)  
90 [1c](#)), which constituted a sizable fraction of the liposomal structures in our samples. Such chains of  
91 dumbbells, which consist of a linear array of many liposomes that are mutually connected by a neck, result  
92 from a shape transformation of a continuous membrane system during the process of liposome formation

93 (Movie 2). The chain topology, where both leaflets of the membrane are continuously connected, presents  
94 a useful framework to study the function of DynA at dumbbell necks in reverse topology.

95

96 In order to probe the nature of the membrane connectivity between lobes, we performed FRAP experiments,  
97 where the fluorescent lipids of one liposome within the chain were photobleached. The fluorescence  
98 intensity subsequently recovered over time as lipids flowed across the neck region that connected the  
99 adjacent lobes<sup>18</sup>, see Figure 1d-f. We quantified the degree of fluorescence recovery by the normalized  
100 intensity ( $N_I$ ), which measures the ratio between the final fluorescence intensity of the bleached lobe after  
101 recovery and that of a neighbouring control lobe that was not photobleached (for details, see Supplementary  
102 Note 1, Figure S2, S3). This intensity  $N_I$  is normalized such that a final value of  $N_I=1$  indicates full recovery,  
103 while  $N_I=0$  signifies the absence of any recovery.

104

105 We observed three distinct outcomes of these FRAP experiments on liposome chains that were otherwise  
106 indistinguishable from each other as they all were connected by necks harbouring a DynA cluster. In some  
107 chains, full recovery occurred to  $N_I=1$  (Fig. 1d; Movie 3), indicating that both leaflets of the membranes of  
108 the two adjacent lobes were fully connected and supported lipid diffusion. This indicates the presence of an  
109 open neck, as also confirmed from control FRAP experiments on dumbbell-shaped liposomes without  
110 DynA, which yielded the same result (Figure S4, S6b). A second set of data showed, even after prolonged  
111 time, only a partial recovery that plateaued at a  $N_I$  value somewhere between 0 and 1 (Fig. 1e; Movie 4).  
112 This is consistent with a scenario where hemi-scission had occurred, meaning that the inner leaflet of the  
113 membrane had undergone fusion (thus preventing lipid diffusion across the neck), while lipids in the outer  
114 leaflet could still freely flow between the lobes, yielding a partial recovery of the bilayer fluorescence  
115 signal. Finally, some dumbbells displayed no recovery at all in FRAP experiments (Figure 1f, Movie 5),  
116 consistent with a scenario where both leaflets had undergone scission. Even upon full scission, we observed  
117 that the lobes did not detach from each other, most likely due to the presence of  $Mg^{++}$  ions in the outer  
118 buffer which bridges negatively charged lipids in the membrane. However, at least in one case, we observed  
119 lobe detachment upon scission (Figure S5).

120

121 To quantify these data and to discern to what extent these membrane (hemi-)scission events can be  
122 attributed to the action of DynA, we performed lipid FRAP experiments on a large dataset of chains of  
123 dumbbells ( $n = 207$ ) that were generated by having either (1) only bare membrane (BM), or (2) chol-oligo  
124 + nanostars on the outside (BM+CN), or (3) CN on the outside as well as DynA on the inside  
125 (BM+CN+DynA). Pooling all data together yielded a plot for the normalized intensity  $N_I$  with three  
126 distinguishable populations that we fitted with Gaussians (Figure S6a). From fitting, we extracted mean

127 values for the three populations that correspond to no lipid recovery (average  $N_{1,1}=0.04$ , close to 0), partial  
128 recovery (average  $N_{1,2}=0.31$ ), and full recovery (average  $N_{1,3}=0.92$ , close to 1). Note that the  $N_{1,2}=0.31$  peak  
129 is very close to the expected value of 0.33 for an ideal case of membrane hemi-scission ([Supplementary](#)  
130 [Note 1, Figure S2](#)). Identification of these peaks with events of, respectively, no scission (open neck), hemi-  
131 scission, and full-scission events, allowed us to quantify the number of these events in the different profiles  
132 for  $N_1$  for each experimental condition.

133  
134 As [Figure 2a](#) shows, the vast majority (85%) of dumbbell liposomes formed by the nanostars featured an  
135 open neck, as only a marginal increase of membrane hemi-scission (8%) and full scission (7%) events was  
136 observed, compared to dumbbells having only bare membranes which showed virtually all open necks  
137 ([Figure S6b](#)). This, however, strikingly changed upon the addition of DynA. Co-reconstitution of both  
138 DynA on the inside and CN on the outside of chains of dumbbells resulted in 36% of necks in a hemi-  
139 scission state, and 26% in a full scission state ([Figure 2b](#)). This shows that DynA is able to induce both  
140 membrane hemi-scission and full scission in these conditions. DynA was furthermore found to narrow down  
141 the neck diameter, as measured for the subset of dumbbells where neither hemi-scission nor full scission  
142 occurred ([Figure S7](#)). We estimated the degree of DynA enrichment at necks by calculating the Recruitment  
143 Ratio (RR), which compares the DynA fluorescence at necks with the fluorescence of residual protein  
144 present in the lumen of the liposome (see methods). Interestingly, we observed a correlation between the  
145 degree of DynA enrichment and the propensity of the necks to undergo membrane rearrangement ([Figure](#)  
146 [2c](#)). Full scission occurred more frequently when the degree of enrichment was relatively low ( $RR = 8 \pm$   
147  $3$ ,  $N=14$ , mean  $\pm$  SD), while the neck was more likely to be trapped in a hemi-scission intermediate when  
148 a higher amount of DynA was assembled to the neck ( $RR = 28 \pm 20$ ,  $N=12$ , mean  $\pm$  SD). This may indicate  
149 that excessive recruitment of DynA can impair the transition from hemi-scission to full scission.

150  
151 In order to verify that the partial lipid recovery in FRAP experiments indeed corresponds to membrane  
152 hemi-scission, we encapsulated a soluble dye and performed simultaneous photobleaching of the lipids in  
153 the membrane and of the dye that was encapsulated in the lumen of the liposome. In the absence of DynA  
154 localization at the neck, dumbbells always exhibited full recovery of both the lipids and of the soluble dye  
155 ([Figure 3a](#)). This indicates that lipids and the soluble dye could freely diffuse across the necks, as expected.  
156 In the presence of DynA, however, we often observed that upon bleaching of both dye and lipids, the lipids  
157 recovered only partially (as described above, cf. [Figure 1d](#)), while the soluble dye in the inner volume of  
158 the liposome did not recover at all ([Figure 3b](#)). This corroborates the presence of a hemi-scission state,  
159 which allows lipids from the outer leaflet to recover, while fully preventing both the lipids of the inner  
160 leaflet and the soluble dye from flowing across the neck.

161  
162 We quantified the degree of recovery of both dye and lipids for each dumbbell, yielding the scatter plot  
163 shown in [Figure 3c](#). In about half of the dumbbells, we observed a full recovery of both dye and lipids,  
164 indicating the presence of an open neck. In the remaining 50%, however, we observed either a partial lipid  
165 recovery or a total absence of lipid recovery, consistent with the hemi-scission and full scission data shown  
166 in [Figure 2](#). Importantly, in 100% of cases in which the soluble dye did not recover, we observed either  
167 partial or a complete absence of lipid recovery. This correlation is expected for a closed neck, which  
168 prevents the dye from recovering. This can happen either by full scission, in which case no lipid recovery  
169 is observed, or by hemi-scission, where scission of the inner leaflet would allow partial lipid recovery. The  
170 data thus confirm that partial lipid recovery corresponds to a hemi-scission state.

171

## 172 **Discussion**

173

174 In this paper, we showed that bacterial Dynamin A is able to trigger membrane scission when assembled  
175 inside membrane necks in dumbbell-shaped liposomes. With this demonstrated functionality, Dynamin A  
176 adds to the family of membrane-remodelling proteins involved in fusion and scission ([Figure 4a](#)). In earlier  
177 experiments, eukaryotic dynamin was shown to be able to induce membrane scission when assembled on  
178 the outside of membrane nanotubes<sup>19</sup> and a hemi-scission intermediate was visualized<sup>20</sup>. The present work  
179 is the first example of visualization of membrane hemi-scission triggered by a protein assembled inside  
180 membrane necks.

181

182 Bacterial DynA was previously shown to promote membrane fusion when assembled on the outer leaflet  
183 of liposomes *in vitro*<sup>14</sup>. Our work is the first demonstration of membrane *scission* activity by a bacterial  
184 member of the Dynamin superfamily and, to the best of our knowledge, bacterial DynA is the only example  
185 of a protein able to trigger both membrane fusion and scission. DynA was previously modelled as a protein  
186 that can tether membranes in trans<sup>13</sup>, a configuration that – due to the symmetry of this topological reaction  
187 – can indeed explain liposome fusion as well as scission when DynA is present at the outside or inside,  
188 respectively ([Figure 4b,c](#)).

189

190 Previous attempts to induce membrane scission in dumbbell systems relied on laser irradiation<sup>21</sup> or  
191 curvature induced by proteins that were bound to the outer leaflet<sup>22</sup>. In these reports, the occurrence of  
192 membrane scission was primarily established by observing the separation of daughter liposomes. It is,  
193 however, very common for liposomes to remain connected by lipid nanotubes, but such nanotubes are  
194 notoriously difficult to detect due to their intrinsic low fluorescence intensity (cf. [Figure S8](#)). Instead of

195 apparent vesicle separation, we therefore settled to analyse our dumbbells using FRAP, which is the more  
196 rigorous way to establish membrane connectivity. Furthermore, we performed our experiments on linear  
197 chains of dumbbells, which originated from a single membrane system (Movie 2). Such long linear chains  
198 are unlikely to be the result of liposome adhesion, which would rather yield random aggregations.

199  
200 Interestingly, we observed that about half of the membrane remodelling events triggered by DynA arrested  
201 at the hemi-scission stage (Figure 2b, 3b), yielding intermediates that are stable enough to be imaged for  
202 prolonged periods of time. While DynA has the capability to realise full scission, we often found it to do  
203 so only partially. This may be because DynA binds to the lipid headgroups on the inner leaflet of the  
204 membrane neck, while it does not directly interact with the outer leaflet (Figure 4c). Several factors may  
205 play a role in the progression from hemi-scission to full scission. This transition can occur spontaneously  
206 when the neck is thin enough, as it has been estimated *in silico* for necks with an inner radius of about 3  
207 nm<sup>23,24</sup>, and in such a scenario, DynA's role may merely be to reduce the neck width to such low diameters.  
208 Furthermore, the transition to full scission is favoured by membrane tension<sup>25</sup>, and our setup with the SMS  
209 system induces a dumbbell shape to the liposomes with a finite membrane tension<sup>18</sup> that may act to assist  
210 the (hemi-)scission action of DynA. Finally, we observed that the transition to full scission is hindered by  
211 excessive accumulation of DynA at the neck (Figure 2c).

212  
213 The only other protein machinery that so far was demonstrated to mediate membrane scission in an inverted  
214 topology is the eukaryotic ESCRT-III complex. This complex assembles inside membrane necks<sup>26-28</sup> and  
215 triggers full membrane scission<sup>29</sup> in *in vitro* tube-pulling assays. Notably, a hemi-scission intermediate was  
216 never visualized<sup>4,30</sup>. However, in these ESCRT experiments, the nanotube was kept under a pulling tension,  
217 which facilitated scission, while potential hemi-scission intermediates likely became short-lived and hard  
218 to detect. The alternative methodology we have introduced based on FRAP analysis of dumbbell liposomes  
219 allows to discriminate between different membrane connectivity states including hemi-scission. *In vivo*, it  
220 has been shown that the ESCRT-III complex completely disappears before full scission occurs<sup>31</sup>, suggesting  
221 that, similar to DynA, the action of the ESCRT-III complex may only induce hemi-scission.

222  
223 Summing up, we showed that *B. subtilis* DynA promotes membrane scission in reverse topology, unveiling  
224 a new role for this protein. Due to its simplicity, this system presents an attractive candidate to build a  
225 divisome for synthetic cells<sup>11</sup>. A mainstream approach to build a synthetic cell relies on the use of  
226 reconstituted transcription/translation systems (RTTSs) to produce the proteins for growth and division<sup>32</sup>.  
227 The necessity of having multicomponent systems with defined stoichiometries complicates their  
228 implementation, however. Hence, a divisome having fewer components is obviously to be favoured. In this

229 regard, a single-component system like DynA appears to be an excellent choice for building a synthetic  
230 divisome, as it presents advantages over more complex multi-component systems such as ESCRT-III.  
231



232 **Methods**

233

234 **Reagents**

235 Glucose (G7021), MgCl<sub>2</sub> (M8266), silicone oil (317667), and mineral oil (M3516-1L) and Optiprep (60%  
236 (w/v) iodixanol in water, D1556) were purchased from Sigma-Aldrich. Tris-HCl (10812846001) was  
237 purchased from Roche. DOPC (1,2-dioleoyl-*sn*-glycero-3-phosphocholine) (850375), DOPE-PEG(2000)  
238 Amine (1,2-dioleoyl-*sn*-glycero-3-phosphoethanolamine-N-[amino(polyethylene glycol)-2000]  
239 (ammonium salt)) (880234), 18:1 ( $\Delta^9$ -Cis) PG (1,2-dioleoyl-*sn*-glycero-3-phospho-(1'-rac-glycerol)  
240 (sodium salt)) (840475) and DOPE-Rhodamine (1,2-dioleoyl-*sn*-glycero-3-phosphoethanolamine-*N*-  
241 (lissamine rhodamine B sulfonyl) (ammonium salt) (810150C) were purchased from Avanti Lipids. Lipids  
242 were stored and resuspended in anhydrous chloroform (288306, Sigma Alrich). UltraPure bovine serum  
243 albumin used for passivation of the glass coverslips was purchased by ThermoFisher. For the FRAP  
244 experiments on soluble dye, Alexa Fluor™ 488 C5 Maleimide was used (A10254, ThermoFisher).  
245 Composition of solutions used in SMS preparations are shown in Supplementary Table 1 (inner solution)  
246 and Supplementary Table 2 (outer solution).

247

248 **DNA constructs**

249 The 4 DNA oligos composing the cross-shaped nanostars were purchased from IDT. The sequence of the  
250 DNA oligos composing the nanostars and chol-oligo are reported in<sup>18</sup>.

251

252 **Protein purification and labelling**

253 *Bacillus subtilis* DynA was overexpressed from pET16b (kindly provided by Dr. M. Bramkamp) and  
254 purified essentially as described<sup>15</sup>, but eluted with a linear imidazole gradient instead of a step elution. A  
255 solution of ~10  $\mu$ M Dynamin was labelled with eightfold molar excess of Alexa Fluor 488 maleimide in  
256 the presence of 0.05 mM TCEP (45 minutes at room temperature), quenched with 10 mM  $\beta$ -  
257 mercaptoethanol and separated from free label on a Superdex S200 column equilibrated with T5 buffer (50  
258 mM Tris/HCl pH8.0, 500 mM NaCl, 10 % glycerol).

259

260 **Lipid-in-oil suspension and droplets preparation**

261 Lipid-in-oil suspensions were prepared according to<sup>18</sup>. Briefly, lipids solubilized in chloroform were mixed  
262 and blow-dried. They were re-solubilized with chloroform inside a glovebox, and a mixture of silicone and  
263 mineral oil<sup>33</sup> was added. The resulting suspension was sonicated in ice for 15 min. The lipids mix used in  
264 this study was composed of DOPC (89.75% mol/mol), DSPE-PEG2000-biotin (2% mol/mol), DOPG (8%  
265 mol/mol) and DOPE-Rhodamine (0.25% mol/mol).

266

### 267 **Dumbbell preparation**

268 The inner buffer was composed of 50mM Tris pH7.4 + 37% optiprep. The outer buffer was composed of  
269 50mM Tris pH7.4 + 5mM MgCl<sub>2</sub>, to which glucose was added until reaching an osmolarity 40mOsm higher  
270 than the inner buffer. 10μM of each of the four oligomers composing the nanostars and 20μM of  
271 cholesterol-oligo<sup>18</sup> were added to the outer buffer. DynA at 100nM was added to the inner buffer, droplets  
272 were generated by manual pipetting, and they were added to the outer buffer. For the experiment showed  
273 in Figure S5c, a DynA concentration of 20nM was used in order to minimize aggregation and to obtain  
274 dumbbells<sup>18</sup>.

275

### 276 **Data collection and analysis**

277 Fluorescence images were acquired at the midplane of liposomes using spinning disk confocal laser  
278 microscopy (Olympus IX81 microscope, 60× objective, iXon camera) with Andor iQ3 software. To induce  
279 photobleaching, we employed raster scanning with a 491 nm laser (at 9.8 mW) over the region of interest.  
280 To measure the recovery signal, frames were collected every 1 s, starting right after the photobleaching  
281 event. Fluorescence images were analyzed and processed using ImageJ (v2.1.0). The extracted fluorescence  
282 data were plotted and fitted using Python 3. A detailed explanation of the image analysis pipeline is  
283 provided in Supplementary Note 1.

284

### 285 **Calculation of Recruitment Ratio**

286 The Recruitment Ratio  $R_R$  at membrane necks was calculated with the following formula:

$$287 \quad S = \frac{I_{neck}^{protein} - I_{background}^{protein}}{I_{GUV\ lumen}^{protein} - I_{background}^{protein}}$$

288 where  $I_{neck}^{protein}$  and  $I_{GUV\ lumen}^{protein}$  represent the fluorescence intensities of protein at the neck and of residual  
289 protein present in the lumen of the liposome, respectively.

290

291

### 292 **Acknowledgments**

293 We thank S.J. Marrink and W. Pezeshkian for useful discussions, and M. Bramkamp for kindly providing  
294 the plasmid for the *B. subtilis* DynA. We acknowledge funding support from the BaSyC program of NWO-  
295 OCW and from ERC Advanced Grant 883684.

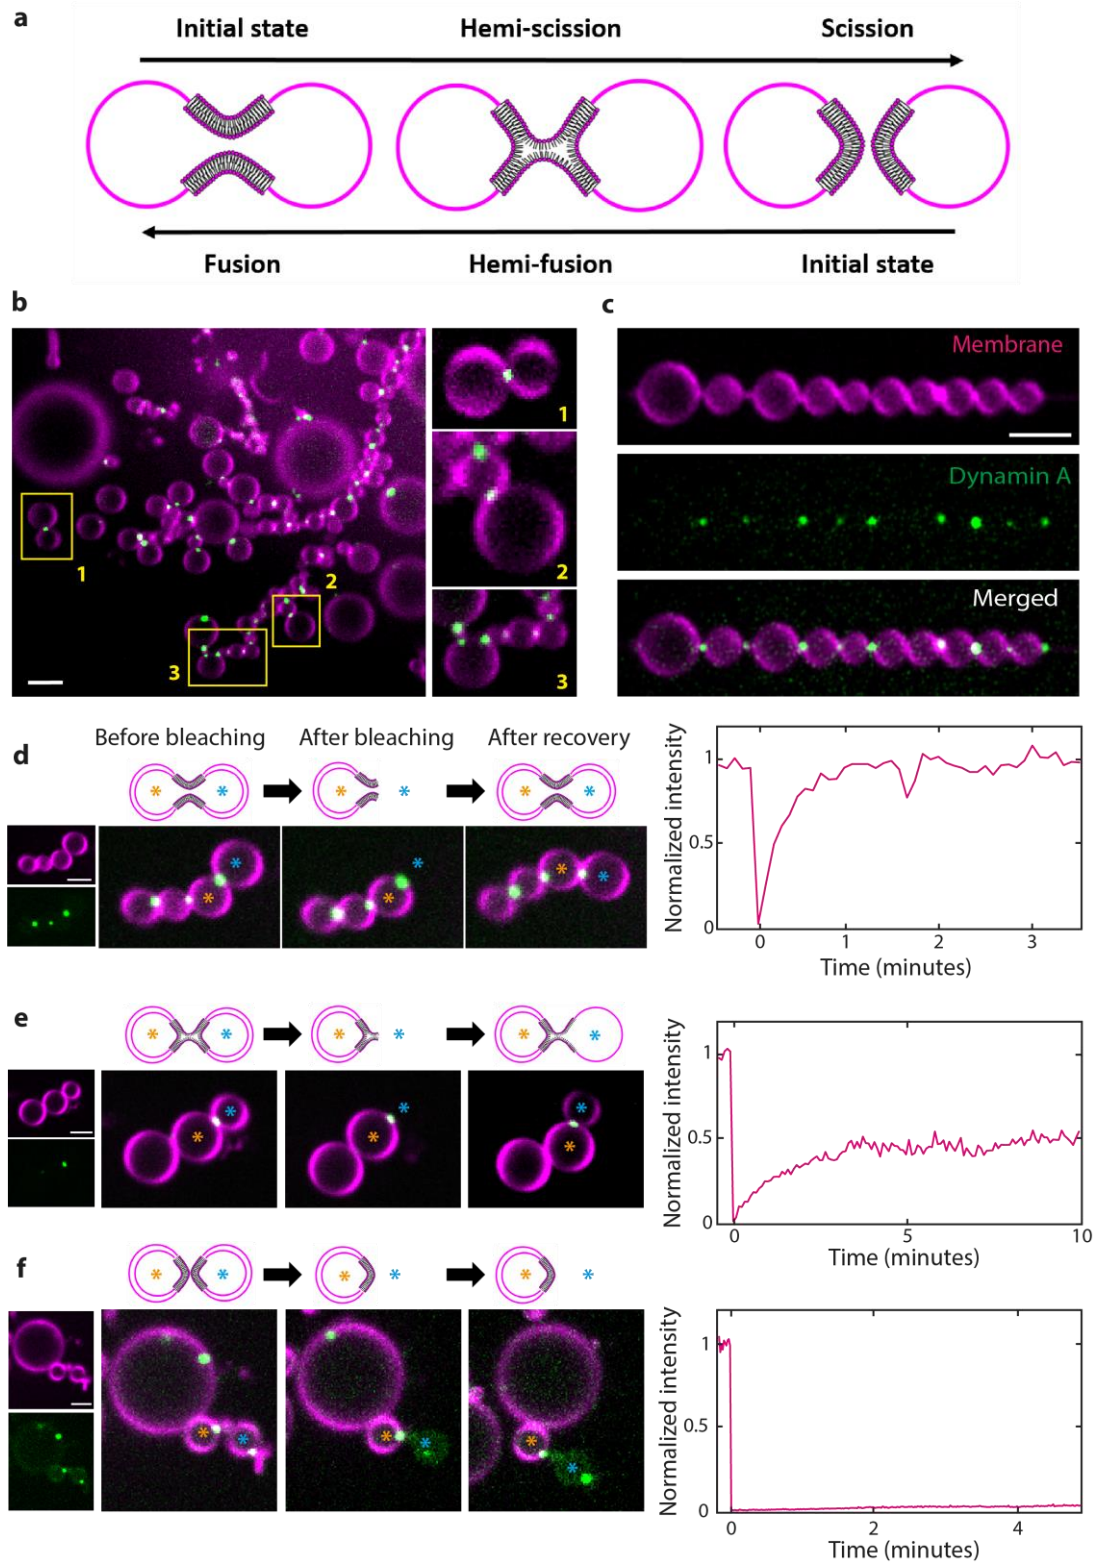

296

297 **Figure 1: Dynamin A localizes at necks of dumbbells and affects membrane connectivity**

298 (a) Schematics depicting the fusion/scission “topological reaction”. (b) Large field of view of a preparation  
 299 of dumbbells with encapsulated DynA generated with the SMS. Insets show detailed views of DynA  
 300 clusters localized at membrane necks. (c) Example of a chain of dumbbells with DynA clusters at multiple

301 necks. **(d)** Full recovery of fluorescent lipids to a normalized intensity  $N_I \approx 1$  upon photo-bleaching of one  
302 lobe of a chain of dumbbells. The bleached and the control lobes are indicated by a blue and an orange  
303 asterisks, respectively. The right panel shows the Normalized Intensity ( $N_I$ ) versus time. Schematics on the  
304 top illustrate the membrane connectivity at the neck that is compatible with the recovery profile. **(e)** Partial  
305 recovery of fluorescent lipids to a normalized intensity  $N_I \approx 0.5$  upon photo-bleaching of a lobe of a chain of  
306 dumbbells. Colours, time trace, and schematics are as in panel a. **(f)** Absence of recovery of fluorescent  
307 lipids upon photo-bleaching of a lobe of a chain of dumbbells. Colours, time trace, and schematics are as  
308 in panel a. The gain in the DynA fluorescence channel was increased to show the continuous presence of  
309 the bleached lobe. All scale bars:  $5\mu\text{m}$ .  
310

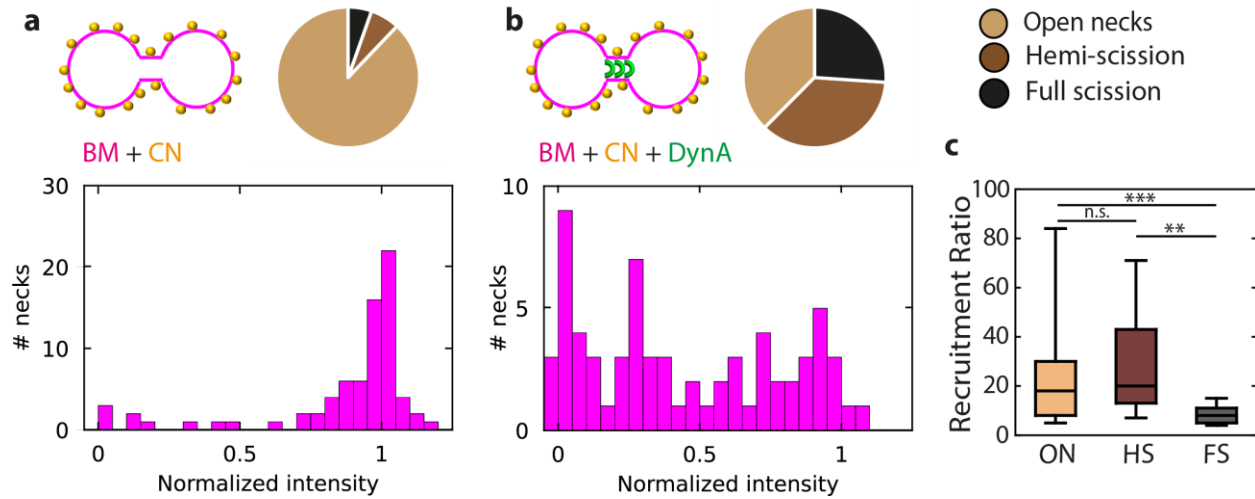

311  
312

313 **Figure 2: Quantification of membrane remodelling events at necks in the presence or absence of**  
314 **DynA**

315 (a) Histogram of normalized intensities  $N_I$  for dumbbells with cholesterol-oligo and nanostars but without  
316 DynA (BM + CN; 75 necks from 7 independent preparations). Top-right: pie-chart indicating the fraction  
317 of open necks, hemi-scission, and full scission events. BM = bare membrane; CN = cholesterol-oligos +  
318 Nanostars. (b) Histogram of normalized intensities  $N_I$  for dumbbells with cholesterol-oligo, nanostars and  
319 DynA (BM + CN+DynA; 69 necks from 12 independent preparations). Top-right: pie-chart indicating the  
320 fraction of open necks, hemi-scission, and full scission events. (c) Recruitment ratio  $R_R$  of DynA. ON =  
321 open necks; HS = hemi-scission; FS = full scission.  $n=18$  for open necks;  $n=12$  for hemi-scission;  $n=14$  for  
322 full scission.  $p$ -value=0.35 for open necks versus hemi-scission;  $p$ -value=0.006 for open necks versus full  
323 scission;  $p$ -value=0.0004 for hemi-scission versus full scission using the Mann-Whitney U Test.

324  
325

326  
327

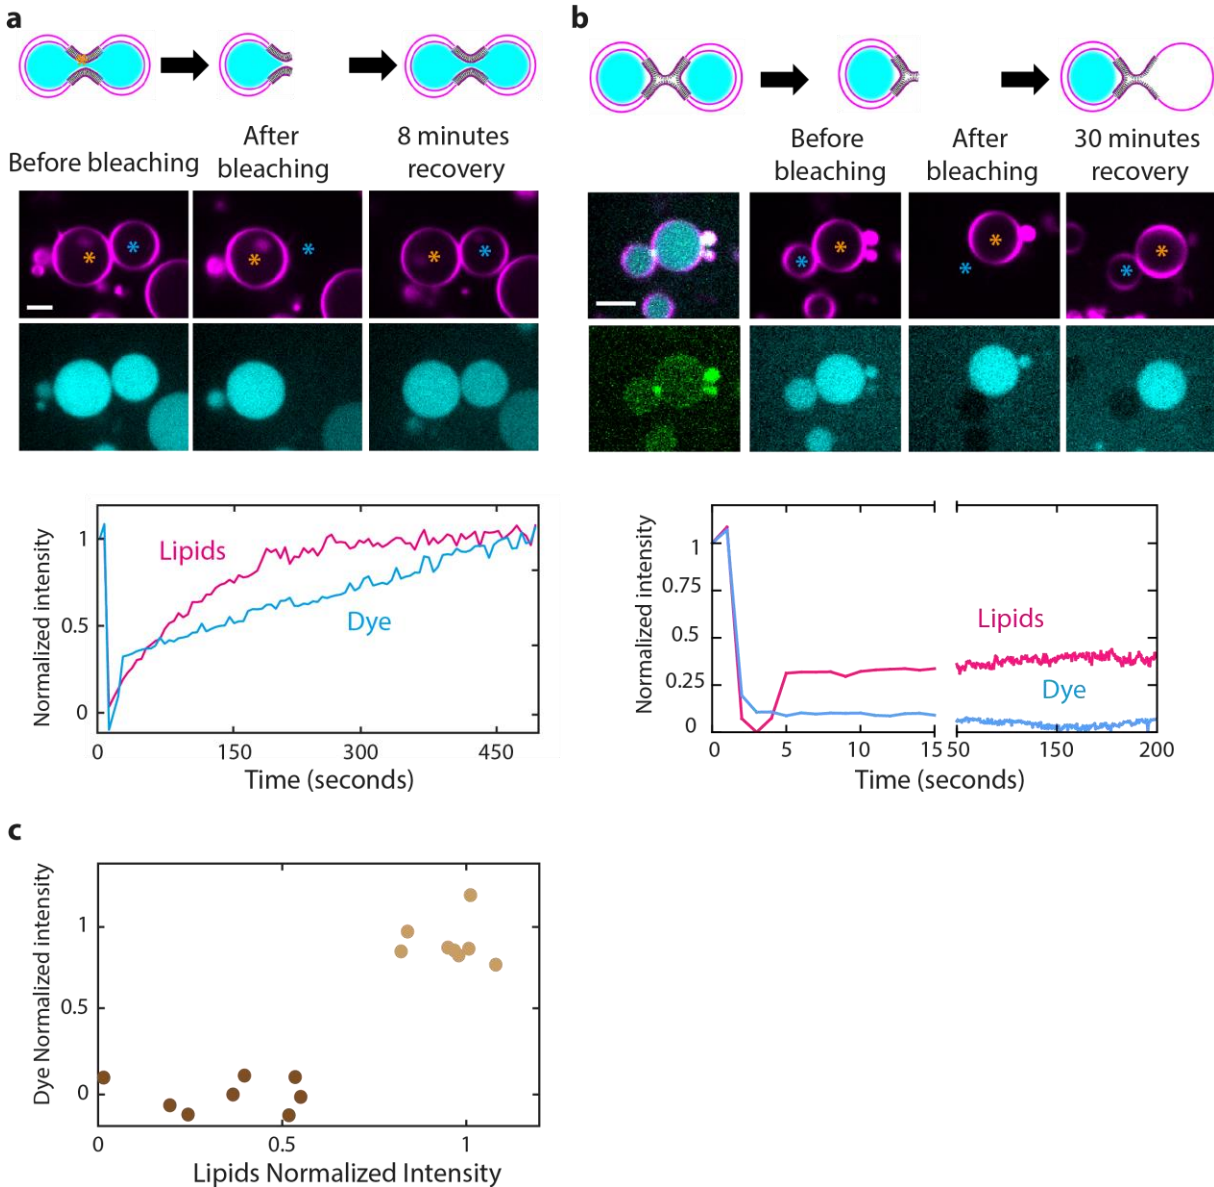

328  
329

330

**Figure 3: Characterization of DynA-induced membrane hemi-scission events**

331 (a) Concomitant FRAP of lipids and soluble dye in dumbbells in the absence of DynA. Bottom: Normalized  
332 Intensity versus time of both lipids and dye. (b) Same as panel a but in the presence of DynA (c) Scatter  
333 plot showing the fraction of open necks, hemi-scission, and full scission events based on lipid recovery and  
334 the correspondent recovery or absence of recovery of the soluble dye (n=16). Open necks are indicated by  
335 in light brown; hemi-scission and scission events in dark brown.

336

337



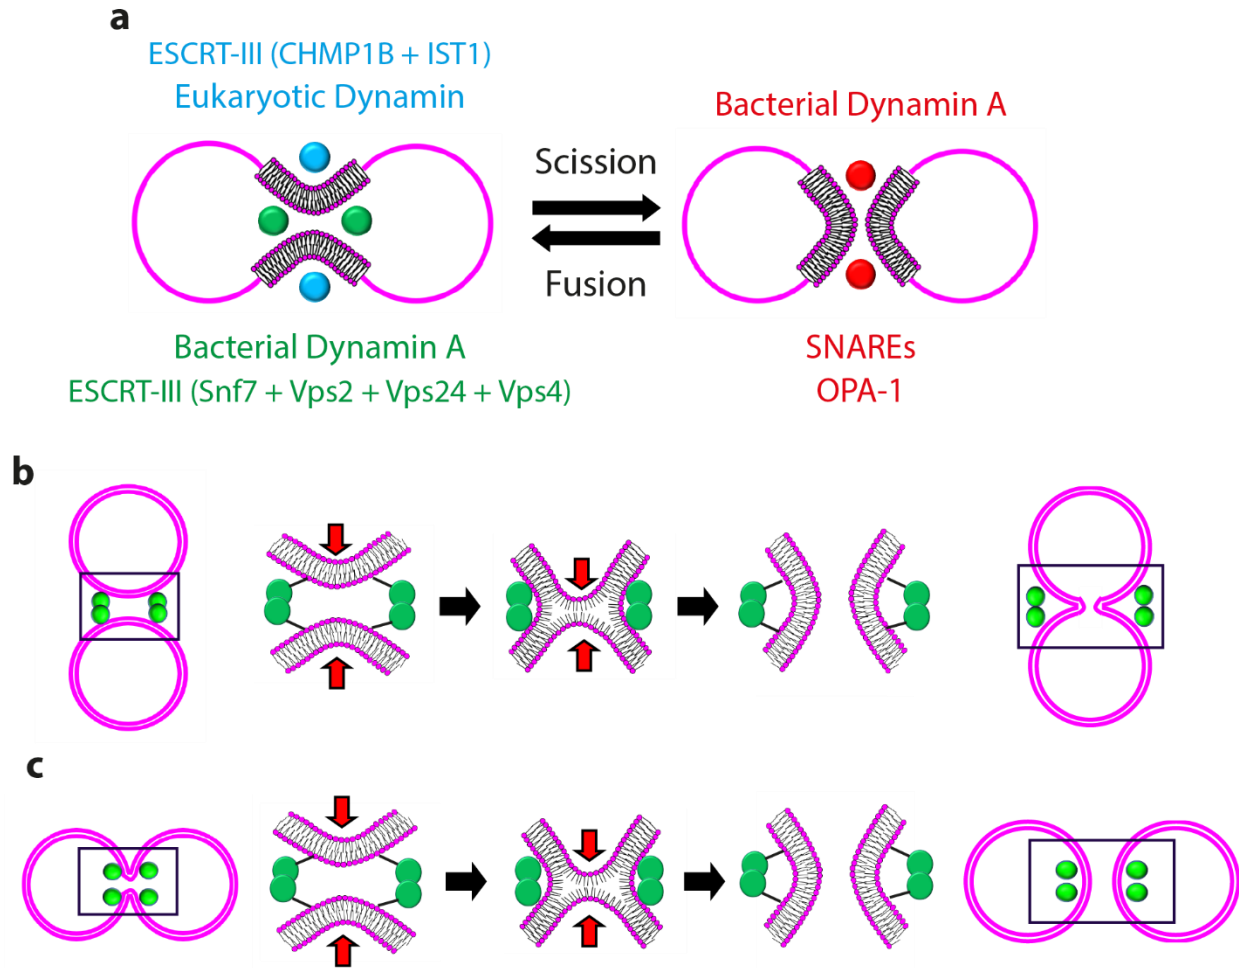

338  
339

340 **Figure 4: DynA in membrane scission and fusion**

341 (a) Schematics summarizing the proteins involved in membrane scission and fusion. The dots indicate the  
342 position of the proteins with respect to the membrane and colours correspond to the protein names listed.  
343 The membrane remodelling activity of all these proteins has been confirmed by previous *in vitro*  
344 reconstitutions<sup>15,29,34-37</sup>, while the scission activity of bacterial DynA is established here. (b) Schematics  
345 representing membrane fusion via a hemi-fusion intermediate with DynA (in green) reconstituted on the  
346 *outer* leaflet. Red arrows indicate the direction of the membrane deformation induced by DynA. (c)  
347 Schematics representing membrane scission via a hemi-scission intermediate with DynA (in green)  
348 reconstituted on the *inner* leaflet.

349  
350  
351

352 **References**

- 353 1. Spira, F. *et al.* Cytokinesis in vertebrate cells initiates by contraction of an equatorial actomyosin  
354 network composed of randomly oriented filaments. *Elife* **6**, (2017).
- 355 2. Allard, J. F. & Cytrynbaum, E. N. Force generation by a dynamic Z-ring in *Escherichia coli* cell  
356 division. *Proc Natl Acad Sci U S A* **106**, 145–50 (2009).
- 357 3. Bisson-Filho, A. W. *et al.* Treadmilling by FtsZ filaments drives peptidoglycan synthesis and bacterial  
358 cell division. *Science* **355**, 739–743 (2017).
- 359 4. Pfitzner, A.-K., Moser von Filseck, J. & Roux, A. Principles of membrane remodeling by dynamic  
360 ESCRT-III polymers. *Trends Cell Biol* **31**, 856–868 (2021).
- 361 5. Caspi, Y. & Dekker, C. Dividing the Archaeal Way: The Ancient Cdv Cell-Division Machinery. *Front*  
362 *Microbiol* **9**, 174 (2018).
- 363 6. Bassereau, P. *et al.* The 2018 biomembrane curvature and remodeling roadmap. *J Phys D Appl Phys*  
364 **51**, (2018).
- 365 7. Hurley, J. H. ESCRTs are everywhere. *EMBO J* **34**, 2398–407 (2015).
- 366 8. Sundborger, A. C. & Hinshaw, J. E. Regulating dynamin dynamics during endocytosis. *F1000Prime*  
367 *Rep* **6**, 85 (2014).
- 368 9. Lemus, L. & Goder, V. Membrane trafficking: ESCRTs act here, there, and everywhere. *Curr Biol* **32**,  
369 R292–R294 (2022).
- 370 10. Bohuszewicz, O., Liu, J. & Low, H. H. Membrane remodelling in bacteria. *J Struct Biol* **196**, 3–14  
371 (2016).
- 372 11. Olivi, L. *et al.* Towards a synthetic cell cycle. *Nat Commun* **12**, 4531 (2021).
- 373 12. Schlimpert, S. *et al.* Two dynamin-like proteins stabilize FtsZ rings during *Streptomyces* sporulation.  
374 *Proceedings of the National Academy of Sciences* **114**, (2017).
- 375 13. Bramkamp, M. Structure and function of bacterial dynamin-like proteins. *Biol Chem* **393**, 1203–14  
376 (2012).
- 377 14. Guo, L. & Bramkamp, M. Bacterial dynamin-like protein DynA mediates lipid and content mixing.  
378 *FASEB J* **33**, 11746–11757 (2019).
- 379 15. Bürmann, F., Ebert, N., van Baarle, S. & Bramkamp, M. A bacterial dynamin-like protein mediating  
380 nucleotide-independent membrane fusion. *Mol Microbiol* **79**, 1294–304 (2011).
- 381 16. Sawant, P., Eissenberger, K., Karier, L., Mascher, T. & Bramkamp, M. A dynamin-like protein  
382 involved in bacterial cell membrane surveillance under environmental stress. *Environ Microbiol* **18**,  
383 2705–20 (2016).
- 384 17. Guo, L., Sattler, L., Shafqat, S., Graumann, P. L. & Bramkamp, M. A Bacterial Dynamin-Like Protein  
385 Confers a Novel Phage Resistance Strategy on the Population Level in *Bacillus subtilis*. *mBio* **13**,  
386 e0375321 (2022).



- 387 18. de Franceschi, N. *et al.* A synthetic membrane shaper for controlled liposome deformation. *bioRxiv*  
388 2021.12.22.473854.
- 389 19. Antony, B. *et al.* Membrane fission by dynamin: what we know and what we need to know. *EMBO*  
390 *J* **35**, 2270–2284 (2016).
- 391 20. Mattila, J.-P. *et al.* A hemi-fission intermediate links two mechanistically distinct stages of  
392 membrane fission. *Nature* **524**, 109–113 (2015).
- 393 21. Dreher, Y., Jahnke, K., Schröter, M. & Göpfrich, K. Light-Triggered Cargo Loading and Division of  
394 DNA-Containing Giant Unilamellar Lipid Vesicles. *Nano Lett* **21**, 5952–5957 (2021).
- 395 22. Steinkühler, J. *et al.* Controlled division of cell-sized vesicles by low densities of membrane-bound  
396 proteins. *Nat Commun* **11**, 905 (2020).
- 397 23. Kozlovsky, Y. & Kozlov, M. M. Membrane fission: model for intermediate structures. *Biophys J* **85**,  
398 85–96 (2003).
- 399 24. Fabrikant, G. *et al.* Computational model of membrane fission catalyzed by ESCRT-III. *PLoS Comput*  
400 *Biol* **5**, e1000575 (2009).
- 401 25. Zhang, G. & Müller, M. Rupturing the hemi-fission intermediate in membrane fission under  
402 tension: Reaction coordinates, kinetic pathways, and free-energy barriers. *J Chem Phys* **147**,  
403 064906 (2017).
- 404 26. de Franceschi, N. *et al.* The ESCRT protein CHMP2B acts as a diffusion barrier on reconstituted  
405 membrane necks. *J Cell Sci* **132**, (2018).
- 406 27. Bertin, A. *et al.* Human ESCRT-III polymers assemble on positively curved membranes and induce  
407 helical membrane tube formation. *Nat Commun* **11**, 2663 (2020).
- 408 28. Pfitzner, A.-K. *et al.* An ESCRT-III Polymerization Sequence Drives Membrane Deformation and  
409 Fission. *Cell* **182**, 1140-1155.e18 (2020).
- 410 29. Schöneberg, J. *et al.* ATP-dependent force generation and membrane scission by ESCRT-III and  
411 Vps4. *Science* **362**, 1423–1428 (2018).
- 412 30. Remec Pavlin, M. & Hurley, J. H. The ESCRTs - converging on mechanism. *J Cell Sci* **133**, (2020).
- 413 31. Johnson, D. S., Bleck, M. & Simon, S. M. Timing of ESCRT-III protein recruitment and membrane  
414 scission during HIV-1 assembly. *Elife* **7**, (2018).
- 415 32. Abil, Z. & Danelon, C. Roadmap to Building a Cell: An Evolutionary Approach. *Front Bioeng*  
416 *Biotechnol* **8**, 927 (2020).
- 417 33. van de Cauter, L. *et al.* Optimized cDICE for Efficient Reconstitution of Biological Systems in Giant  
418 Unilamellar Vesicles. *ACS Synth Biol* **10**, 1690–1702 (2021).
- 419 34. Cada, A. K. *et al.* Friction-driven membrane scission by the human ESCRT-III proteins CHMP1B and  
420 IST1. *Proc Natl Acad Sci U S A* **119**, e2204536119 (2022).

- 421 35. Roux, A., Uyhazi, K., Frost, A. & de Camilli, P. GTP-dependent twisting of dynamin implicates  
422 constriction and tension in membrane fission. *Nature* **441**, 528–31 (2006).
- 423 36. Tucker, W. C., Weber, T. & Chapman, E. R. Reconstitution of Ca<sup>2+</sup>-regulated membrane fusion by  
424 synaptotagmin and SNAREs. *Science* **304**, 435–8 (2004).
- 425 37. Ge, Y. *et al.* Two forms of Opa1 cooperate to complete fusion of the mitochondrial inner-  
426 membrane. *Elife* **9**, (2020).
- 427
